# Supplementary material for: Clinical Efficacy of Acupuncture for the Treatment of Rheumatoid Arthritis: Meta-Analysis of Randomized Clinical Trials
Source: Hindawi journal article supplement (doi:10.1155/2022/5264977), 2022-04-30

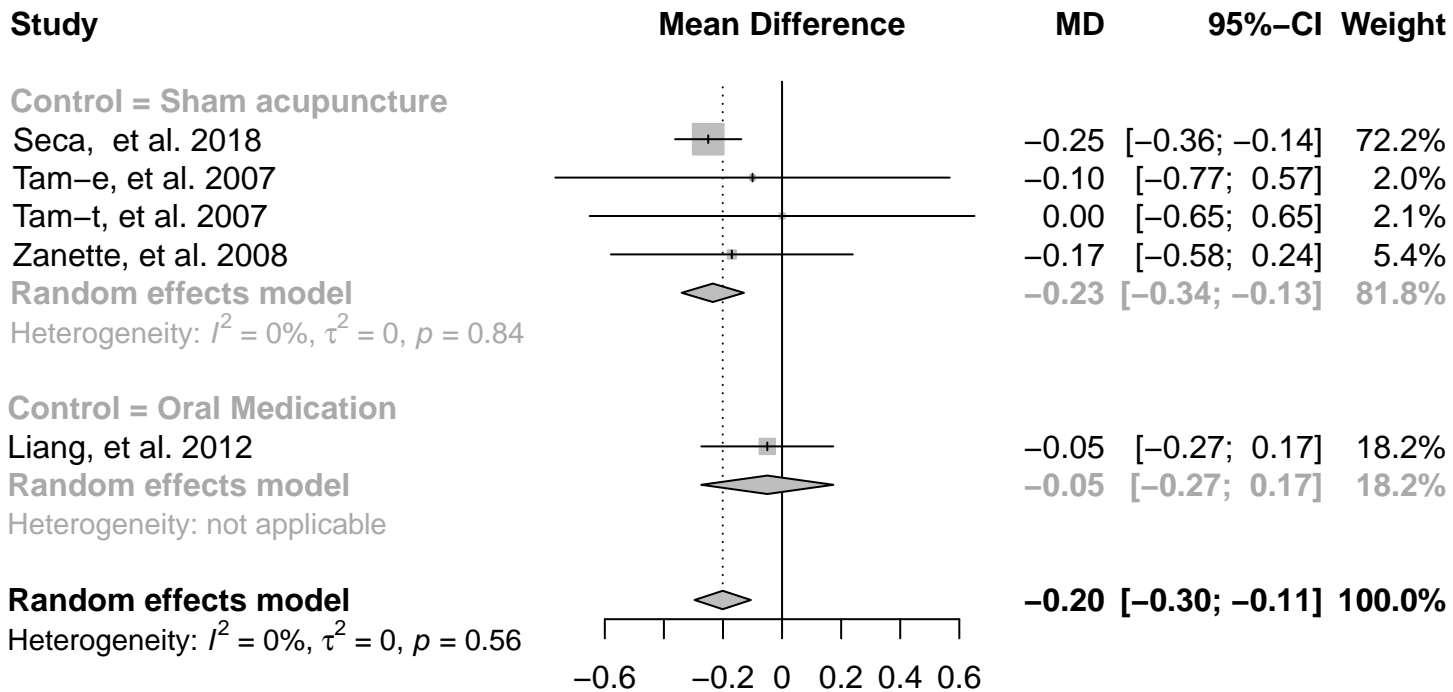

Supplement: f1 [file 5264977.f1.pdf]
